# Supplementary material for: Novel, flexible, and transparent thin film polyimide aerogels with enhanced thermal insulation and high service temperature
Source: Royal Society of Chemistry journal article supplement (doi:10.1039/d1tc06122d), 2022-01-01
Supplement: d1tc06122d1.pdf [file d1tc06122d1.pdf]

## Supporting Information

# Novel, Flexible, and Transparent Thin Film Polyimide Aerogels with Enhanced Thermal Insulation and High Service Temperature

Omid Aghababaei Tafreshi<sup>a,†</sup>, Shahriar Ghaffari Mosanenzadeh<sup>a,†</sup>, Solmaz Karamikamkar<sup>a</sup>, Zia Saadatnia<sup>a</sup>, Sophie Kiddell<sup>a</sup>, Chul B. Park<sup>a,‡</sup>, Hani E. Naguib<sup>a,b,\*</sup>

<sup>a</sup> Department of Mechanical and Industrial Engineering, University of Toronto, Toronto, Ontario M5S 3G8, Canada

<sup>b</sup> Department of Materials Science and Engineering, Institute of Biomaterials and Biomedical Engineering, University of Toronto, Toronto, Ontario M5S 3G8, Canada

<sup>†</sup>These authors contributed equally to this work.

\*Corresponding author Email: [naguib@mie.utoronto.ca](mailto:naguib@mie.utoronto.ca).

<sup>‡</sup>Co-corresponding author Email: [park@mie.utoronto.ca](mailto:park@mie.utoronto.ca)

## List of Abbreviation

|       |                                                           |      |                                              |
|-------|-----------------------------------------------------------|------|----------------------------------------------|
| 2D    | Two-dimensional                                           | PI   | Polyimide                                    |
| 3D    | Three-dimensional                                         | PINF | PI nanofibers                                |
| 6FAPB | 2,2-bis(3,4-dicarboxyphenyl)hexafluoropropane dianhydride | PMDA | Pyromellitic dianhydride                     |
| BAP4  | 1,4-bis(4-aminophenoxy)butane                             | PMN  | Endic anhydride maleic anhydride copolymer   |
| BAP6  | 1,6-bis(4-aminophenoxy)hexane                             | POSS | Polyhedral oligomeric silsesquioxane         |
| BAP10 | 1,10-bis(4-aminophenoxy)decane                            | PPDA | P-phenylenediamine                           |
| BAPN  | 1,3-bis(4-aminophenoxy)-2,2-dimethylpropane               | PSMA | Styrene-maleic anhydride copolymer           |
| BPDA  | Biphenyl-tetracarboxylic acid dianhydride                 | PTFE | Polytetrafluoroethylene                      |
| BTC   | 1,3,5-benzenetricarbonyl tri-chloride                     | PU   | Polyurethan                                  |
| BTFB  | 2,2'-Bis(trifluoromethyl)benzidine                        | PVDF | Polyvinylidene fluoride                      |
| DADD  | 1,12-dodecyldiamine                                       | TAB  | 1,3,5-triaminophenoxybenzene                 |
| CBDA  | 1,2,3,4-cyclobutanetetracarboxylic dianhydride            | TEA  | Triethylamine                                |
| DMBZ  | 3,3'-dimethylbenzidine                                    | TFDB | 2,2-bis(trifluoromethyl)-4,4-diaminobiphenyl |
| CNF   | Cellulose nanofiber                                       | TFMB | 2,2-bis(trifluoromethyl)-4,4-diaminobiphenyl |
| FEP   | Poly(tetrafluoroethylene-co-hexafluoropropylene)          | TGA  | Thermogravimetric analyzer                   |
| FPEN  | Fluorinated polyarylene ether nitrile                     | TPU  | Thermoplastic polyurethane                   |
| FTIR  | Fourier-transform infrared spectroscopy                   | WCA  | Water contact angle                          |
| MSQ   | Poly(methyl silsesquioxane)                               |      |                                              |
| NMP   | N-methylpyrrolidinone                                     |      |                                              |
| OAPS  | Octa(aminophenyl)silsesquioxane                           |      |                                              |
| ODA   | 4,4'-oxydianiline                                         |      |                                              |
| ODPA  | 4,4'-oxydiphthalic dianhydride                            |      |                                              |
| PAA   | Polyamic acid                                             |      |                                              |
| PABZ  | 2-(4-aminophenyl)-5-aminobenzimidazole                    |      |                                              |
| PC    | Personal computer                                         |      |                                              |

**Table S1.** Summary of PI aerogel films reported in literature

| Diamine       | Dianhydride | Crosslinker | Fabrication Method         | Drying Technique | Density (g/cm <sup>3</sup> ) | Surface Area (m <sup>2</sup> /g) | Thermal conductivity (mW/m.K) | Onset of decomposition (°C) | Transparent (yes/no) | Flexible (yes/no) | Application                            | Ref       |
|---------------|-------------|-------------|----------------------------|------------------|------------------------------|----------------------------------|-------------------------------|-----------------------------|----------------------|-------------------|----------------------------------------|-----------|
| PPDA          | BPDA        | BTC         | Mold casting               | SCD              | 0.323-0.424                  | 244.5-380.5                      | NA                            | 606                         | Yes                  | NA                | TENG                                   | [1]       |
| ODA           | BPDA        | TAB         | Mold casting               | SCD              | 0.108-0.235                  | 177-383                          | NA                            | NA                          | No                   | Yes               | Filtration                             | [2]       |
| ODA/DMBZ      | BPDA        | OAPS        | Doctor Blade               | SCD              | NA                           | 212                              | NA                            | NA                          | No                   | Yes               | TENG                                   | [3]       |
| ODA/BAPx      | BPDA        | TAB         | Mold casting               | SCD              | 0.110-0.299                  | 191-445                          | NA                            | 496-515                     | No                   | Yes               | Substrate for lightweight antenna      | [4]       |
| DMBZ/BAPN     | BPDA        | TAB         | Mold casting               | SCD              | 0.079-0.304                  | 239-490                          | NA                            | NA                          | No                   | Yes               | Substrate for lightweight antenna      | [5]       |
| DMBZ/DADD     | BPDA        | TAB         | Mold casting               | SCD              | 0.076-0.228                  | 47-482                           | NA                            | NA                          | No                   | Yes               | Substrate for lightweight antenna      | [6]       |
| BAX           | BPDA        | OAPS        | Doctor Blade               | SCD              | NA                           | NA                               | 14.4                          | NA                          | NA                   | Yes               | Insulation in aerospace                | [7]       |
| ODA/OTD       | PMDA        | NA          | Mold casting               | SCD              | 0.161-0.332                  | NA                               | ~35-45                        | NA                          | Yes                  | Yes               | Solar thermal collector                | [8]       |
| ODA/DMBZ/PPDA | BPDA        | OAPS        | Doctor Blade               | SCD              | 0.108-0.451                  | 254-507                          | NA                            | NA                          | No                   | Yes               | NA                                     | [9]       |
| BAPP          | BTDA        | TAB         | Doctor Blade               | SCD              | 0.26-0.39                    | NA                               | NA                            | NA                          | No                   | Yes               | Aerospace, pipe wrapping, clothing     | [10]      |
| ODA/DMBZ      | BPDA        | BTC         | Mold Casting, Doctor Blade | SCD              | 0.089-0.119                  | NA                               | 27.5-35.8                     | 510-556                     | Yes                  | Yes               | Thermal management in microelectronics | This work |

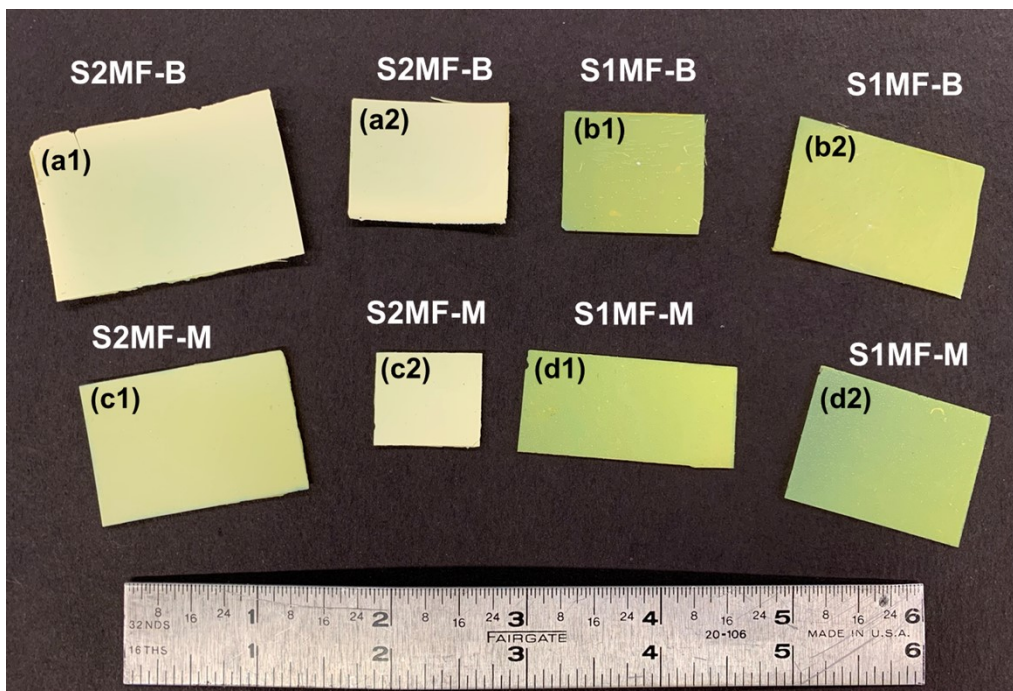

**Figure S1.** Scalability of PI aerogel thin films: (a1) S2MF-B with  $47.9 \times 32.8 \times 0.4 \text{ mm}^3$  dimensions, (a2) S2MF-B with  $31.7 \times 27.8 \times 0.4 \text{ mm}^3$  dimensions, (b1) S1MF-B with  $28.5 \times 24.3 \times 0.6 \text{ mm}^3$  dimensions, (b2) S1MF-B with  $38.7 \times 18.4 \times 0.6 \text{ mm}^3$  dimensions, (c1) S2MF-M with  $39.4 \times 24.5 \times 0.9 \text{ mm}^3$  dimensions, (c2) S2MF-M with  $21.3 \times 20.3 \times 0.9 \text{ mm}^3$  dimensions, (d1) S1MF-M with  $42.2 \times 26.9 \times 0.5 \text{ mm}^3$  dimensions, (d2) S1MF-M with  $35.5 \times 27.1 \times 0.5 \text{ mm}^3$  dimensions

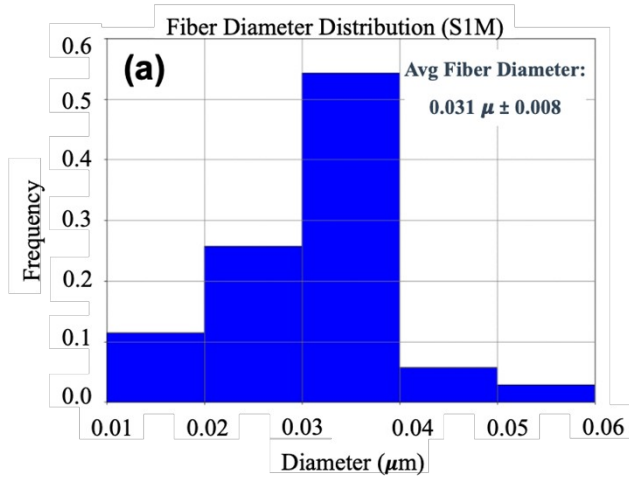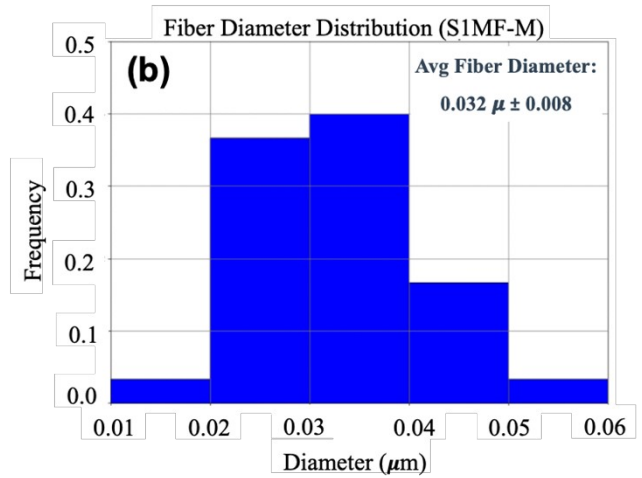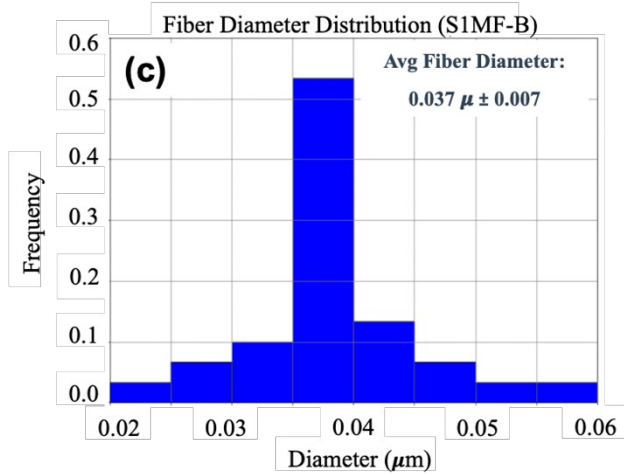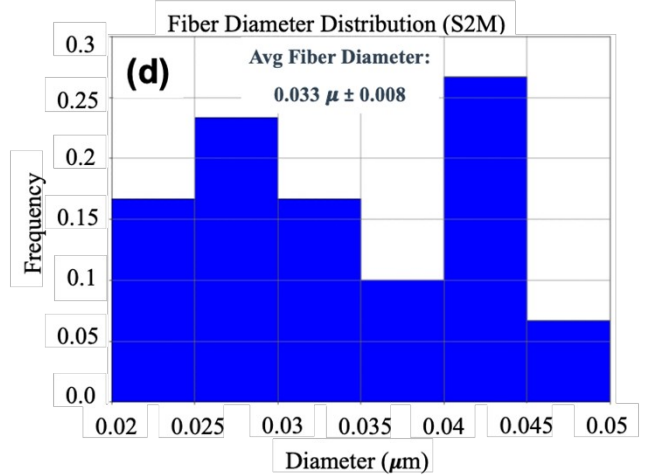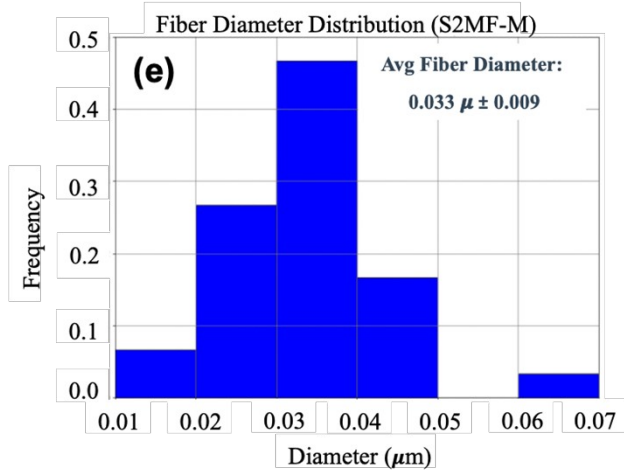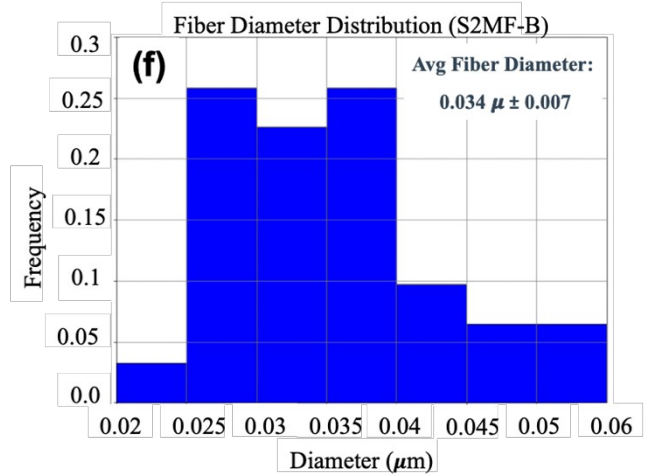

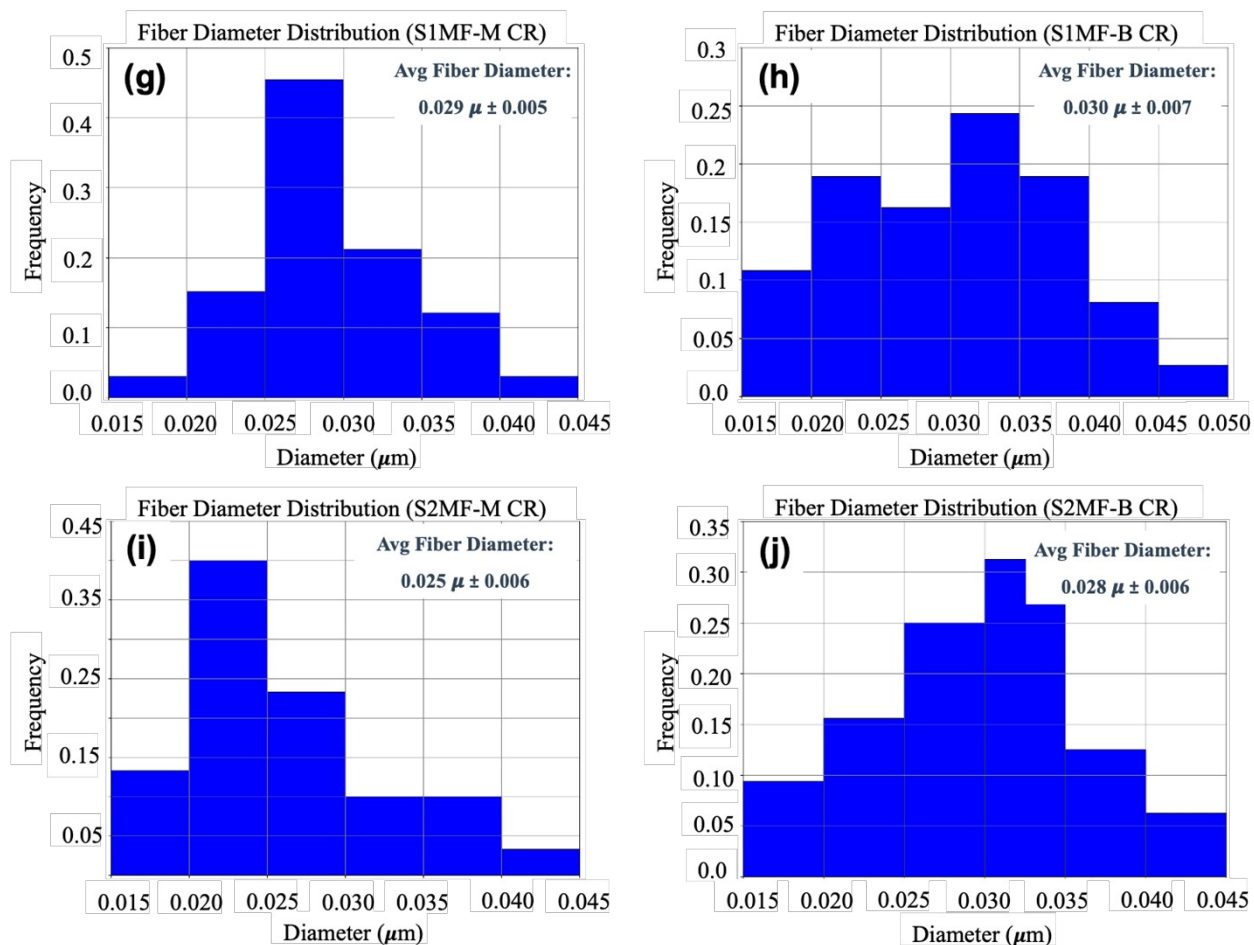

**Figure S2.** Histograms of fiber diameter measurement from SEM morphological graphs of PI aerogel samples

**Table S2.** Summary of average fiber diameters and standard deviations measured from SEM morphological graphs of PI aerogel samples

| Aerogel Samples                    | S1M   | S1MF-M Skin | S1MF-M CR | S1MF-B Skin | S1MF-B CR | S2M   | S2MF-M Skin | S2MF-M CR | S2MF-B Skin | S2MF-B CR |
|------------------------------------|-------|-------------|-----------|-------------|-----------|-------|-------------|-----------|-------------|-----------|
| Average Fiber Diameter ( $\mu m$ ) | 0.031 | 0.032       | 0.029     | 0.037       | 0.030     | 0.033 | 0.033       | 0.025     | 0.034       | 0.028     |
| Standard Deviation                 | 0.008 | 0.008       | 0.005     | 0.007       | 0.007     | 0.008 | 0.009       | 0.006     | 0.007       | 0.006     |

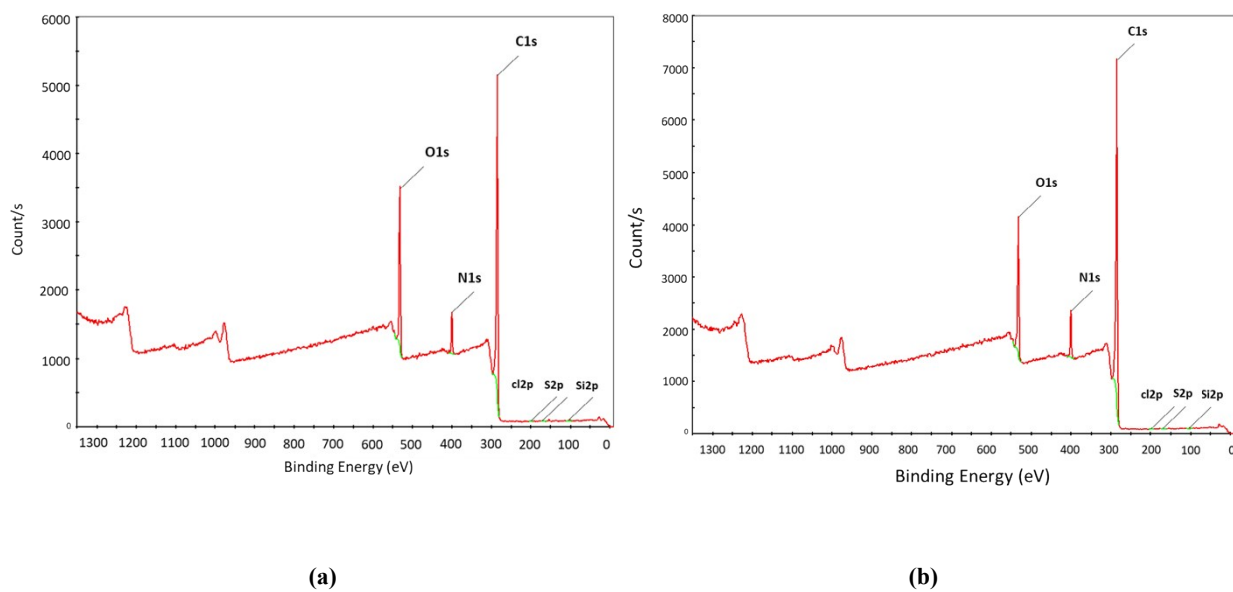

**Table S3.** Relative atomic percentage of elements in PI aerogels

| Sample | Relative Atomic % of Elements |       |      |      |      |      |
|--------|-------------------------------|-------|------|------|------|------|
|        | Si 2p                         | Cl 2p | S 2p | C 1s | O 1s | N 1s |
| S1M    | 0.4                           | 0.0   | 0.0  | 77.5 | 16.3 | 5.7  |
| S2M    | 0.1                           | 0.0   | 0.0  | 79.6 | 13.6 | 6.7  |

**Figure S3.** Low-resolution spectra of XPS data in (a) S1M and (b) S2M

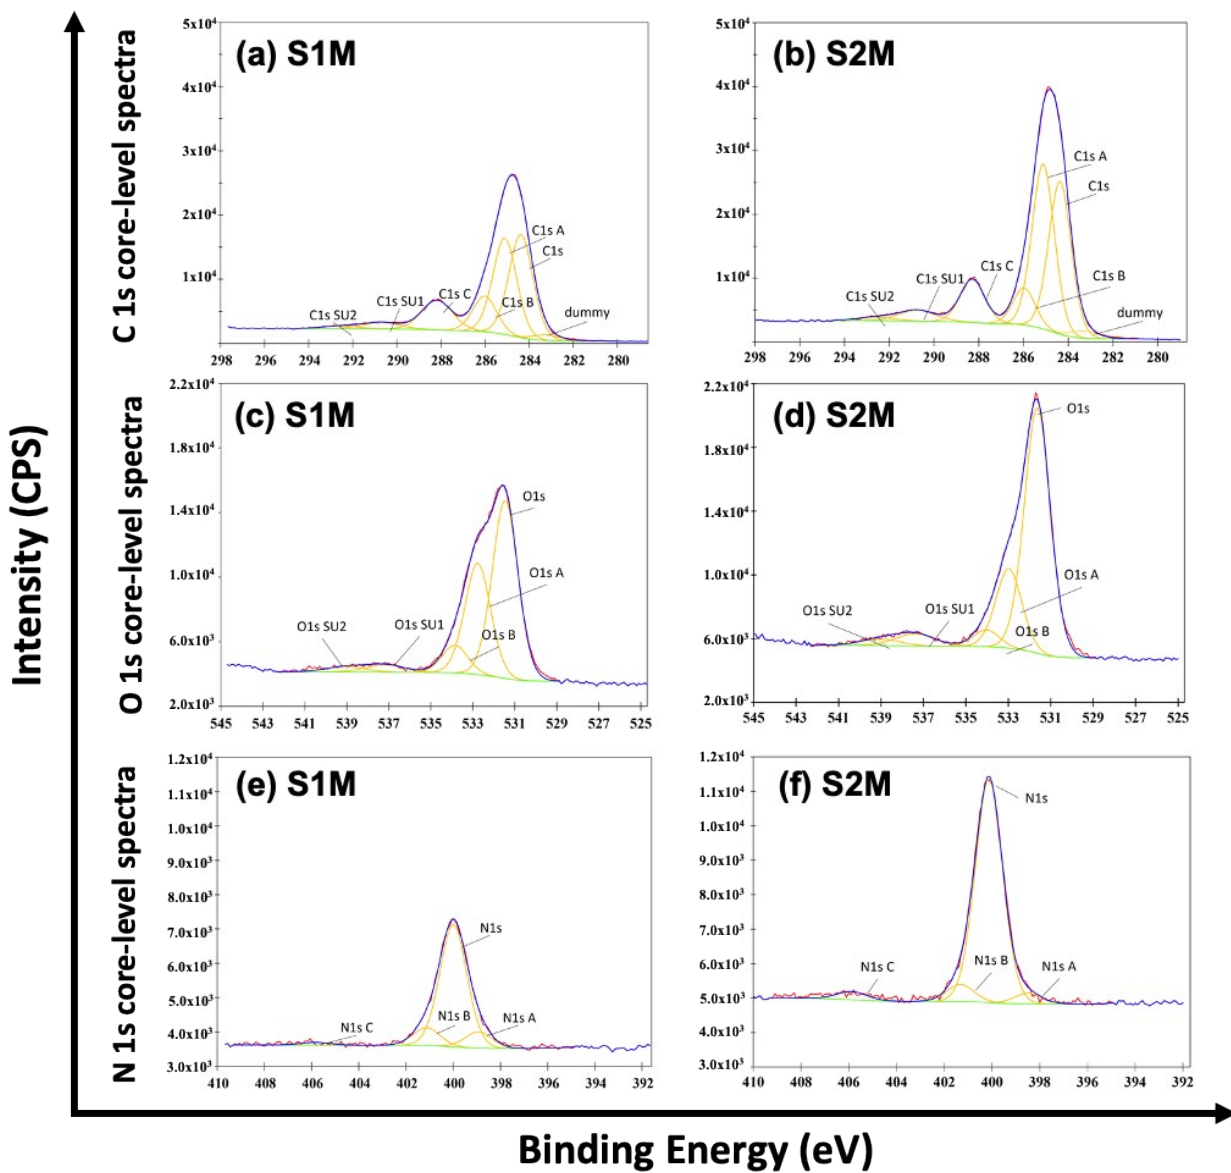

**Figure S4.** The XPS spectra decomposed by the Lorentzian-Gaussian fitting for the aerogel samples: (a) C 1s spectra of S1M; (b) C 1s spectra of S2M; (c) O 1s spectra for S1M; (d) O 1s spectra for S2M; (e) N 1s spectra for S1M; (f) N 1s spectra for S2M



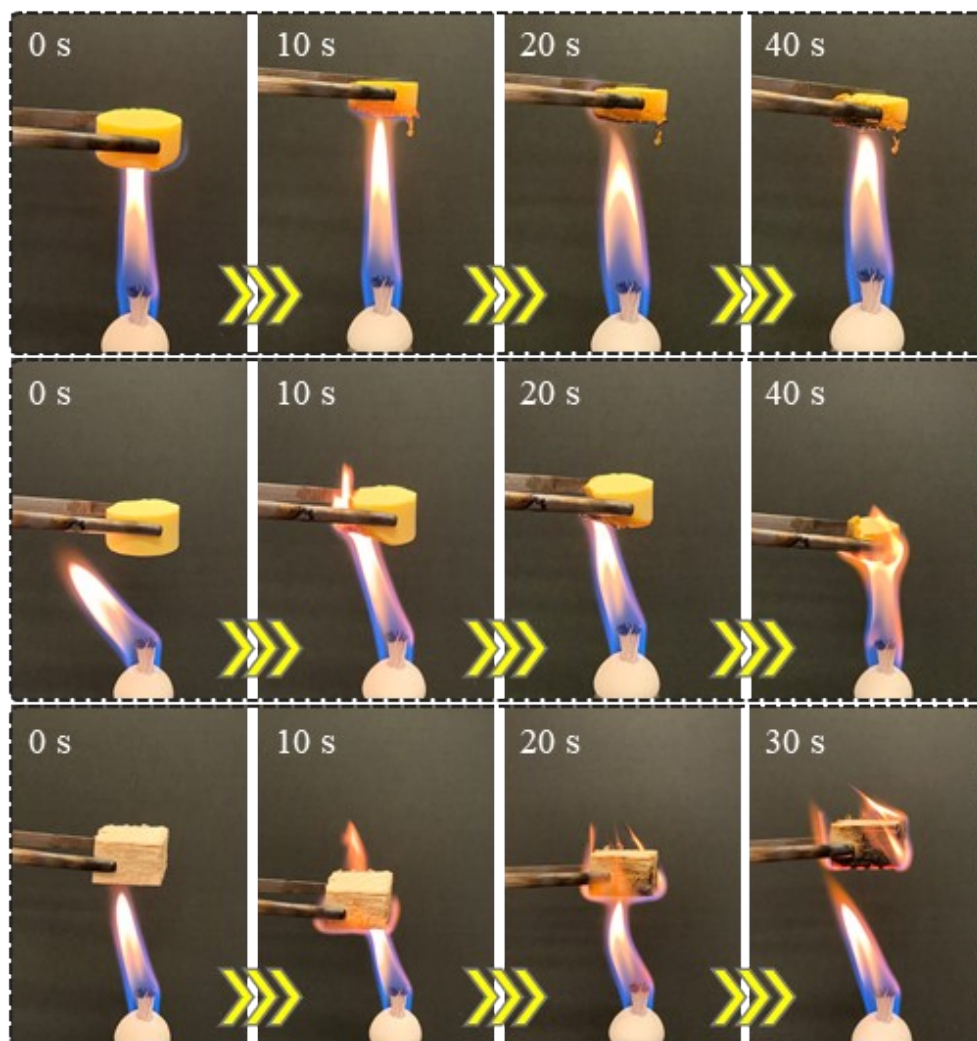

**Figure S5.** Flammability test of aerogels (S1M on the top and S2M in the middle) compared with the one for natural wood (on the bottom)

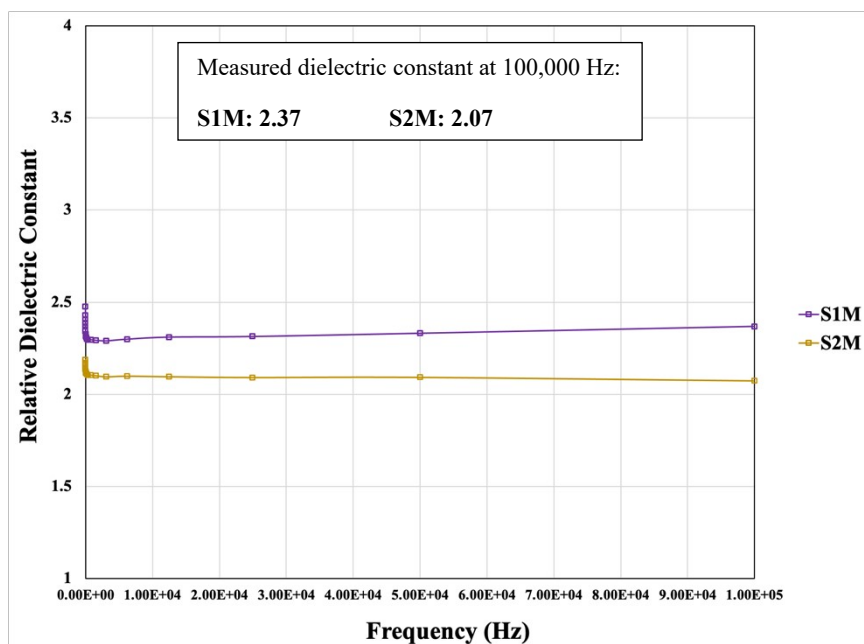

**Figure S6.** Relative dielectric constant measurement of PI aerogel samples in 0-10<sup>5</sup> Hz frequency

## References

- [1] Z. Saadatian, S. G. Mosanenzadeh, E. Esmailzadeh, and H. E. Naguib, *Sci. Rep.*, 2019, **9**, 1–12.
- [2] S. Kang, H. Zhang, J. Yu, Y. Wang, and Z. Hu, *Sep. Purif. Technol.*, 2021, 119393.
- [3] H.-Y. Mi, X. Jing, M. A. B. Meador, H. Guo, L.-S. Turng, and S. Gong, *ACS Appl. Mater. Interfaces*, 2018, **10**, 30596–30606.
- [4] M. Pantoja, N. Boynton, K. A. Cavicchi, B. Dosa, J. L. Cashman, and M. A. B. Meador, *ACS Appl. Mater. Interfaces*, 2019, **11**, 9425–9437.
- [5] J. L. Cashman, B. N. Nguyen, B. Dosa, and M. A. B. Meador, *ACS Appl. Polym. Mater.*, 2020.
- [6] H. Guo *et al.*, *ACS Appl. Mater. Interfaces*, 2020, **12**, 33288–33296.
- [7] H. Guo *et al.*, *ACS Appl. Mater. Interfaces*, 2011, **3**, 546–552.
- [8] X. Hou, R. Zhang, and D. Fang, *ACS Sustain. Chem. Eng.*, 2021.
- [9] H. Guo *et al.*, *ACS Appl. Mater. Interfaces*, 2012, **4**, 5422–5429.
- [10] B. N. Nguyen, D. A. Scheiman, M. A. B. Meador, J. Guo, B. Hamilton, and L. S. McCorkle, *ACS Appl. Polym. Mater.*, 2021, **3**, 2027–2037.
